# Supplementary material for: Is There a Doctor in the House? Patient Experiences Regarding Information-Seeking and Provider Advice in New Jersey’s Medicinal Cannabis Program
Source: Research Square preprint supplement (doi:10.21203/rs.3.rs-8758519/v1), 2026-02-10
Supplement: Supplementary file 1 [file 5aaa78f68f47ff5ddca871da.docx]

**Supplemental Table 1: Comparison of Characteristics of Study Sample with All 2023 NJMCP Enrollees**

| **Demographic Characteristics** | **NJMCP**  **(*n*=91,247)**  **%** | **Study Sample**  **(*n*=228)**  **%** |
| --- | --- | --- |
| **Age** | | |
| *18-30* | 14 | 18 |
| *31-50* | 42 | 50 |
| *51+* | 44 | 32 |
| **Sex** | | |
| *Male* | 53 | 35 |
| *Female/Other* | 47 | 63 |
| **Primary Qualifying Condition** | | |
| *Anxiety* | 31 | 37 |
| *Chronic Pain* | 28 | 33 |
| *PTSD* | 7 | 7 |
| *Migraine* | 4 | 4 |
